# Supplementary material
Source: PubMed Central journal article supplement (PMC6386590)
Supplement: NIHMS1518299-supplement-1.pdf [file NIHMS1518299-supplement-1.pdf]

Supplementary Information

Figure S1

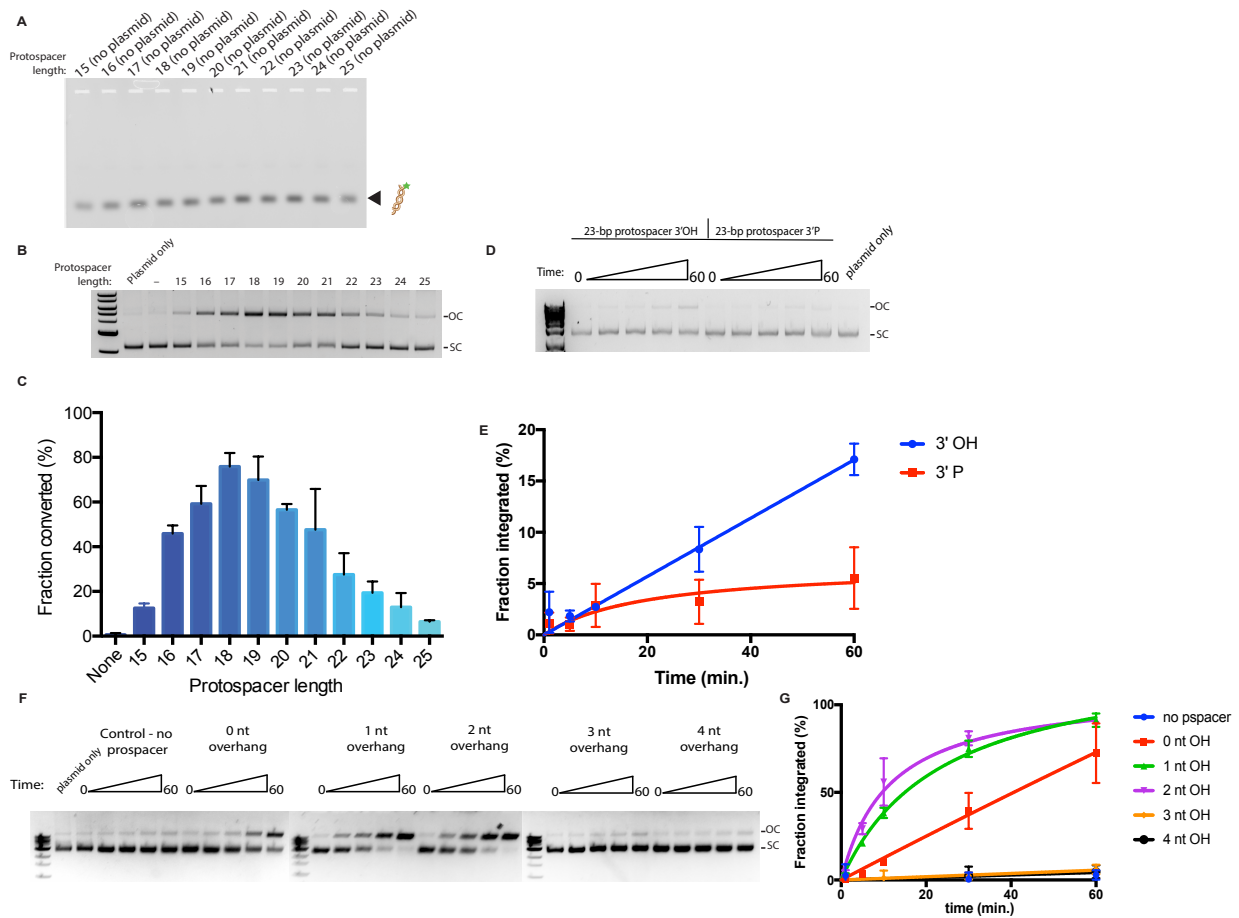

**Figure S1. Related to Figure 2. Determination of type V-C Cas1 protospacer preferences**  
**(A)** Control integration assay with variable length fluorescent protospacers with no plasmid.  
**(B)** Integration assay with variable length protospacers from 15-bp to 25-bp long.  
**(C)** Quantification of (B) demonstrating the effect of protospacer length on the conversion of supercoiled plasmid to open-circle products by type V-C Cas1. The fraction converted is calculated as the fraction of open-circle products relative to all plasmid. Experiments were carried out in triplicate; the bars represent mean values, with error bars depicting standard deviations.  
**(D)** Time-course integration reactions with a 23-bp protospacer and a 23-bp protospacer with 3' phosphate modifications on both strands.  
**(E)** Quantification of (D). Plotted points represent the mean of three independent experiments. Error bars represent standard deviation.  
**(F)** Time-course integration reactions with protospacers with 0- to 4-nt overhangs.  
**(G)** Quantification of (F). Plotted points represent the mean of three independent experiments. Error bars represent standard deviation.

See Table S2 for nucleotide sequences.

**Figure S2**

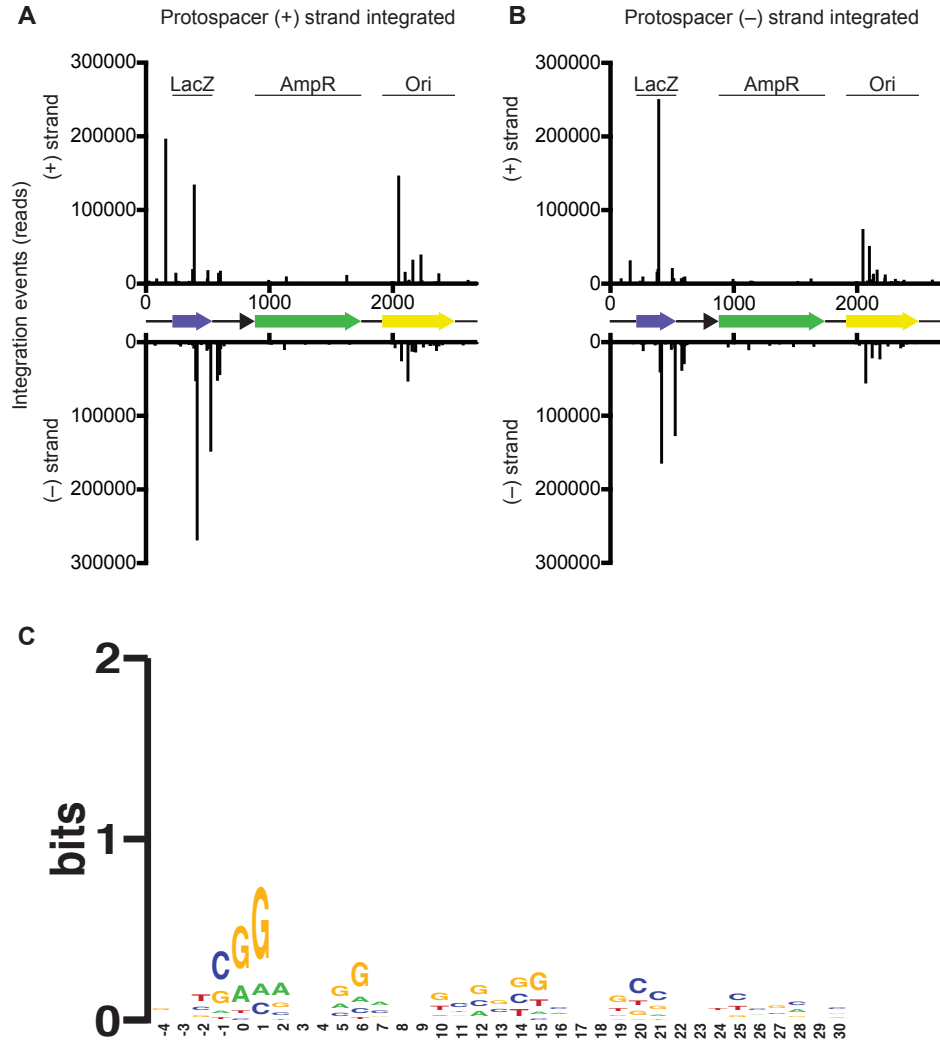

**Figure S2. Related to Figure 3. Integration Sites Along pUC19 and WebLogo for Integration Sites in pCRISPR**  
(A, B) Integration sites along pUC19 for protospacer (+) strand (A) and (-) strand (B).  
(C) WebLogo for integration sites in pCRISPR. The first nucleotide following integration is numbered 1, with the upstream nucleotides labeled -4 through 0.

See Table S2 for nucleotide sequences.

**Figure S3**

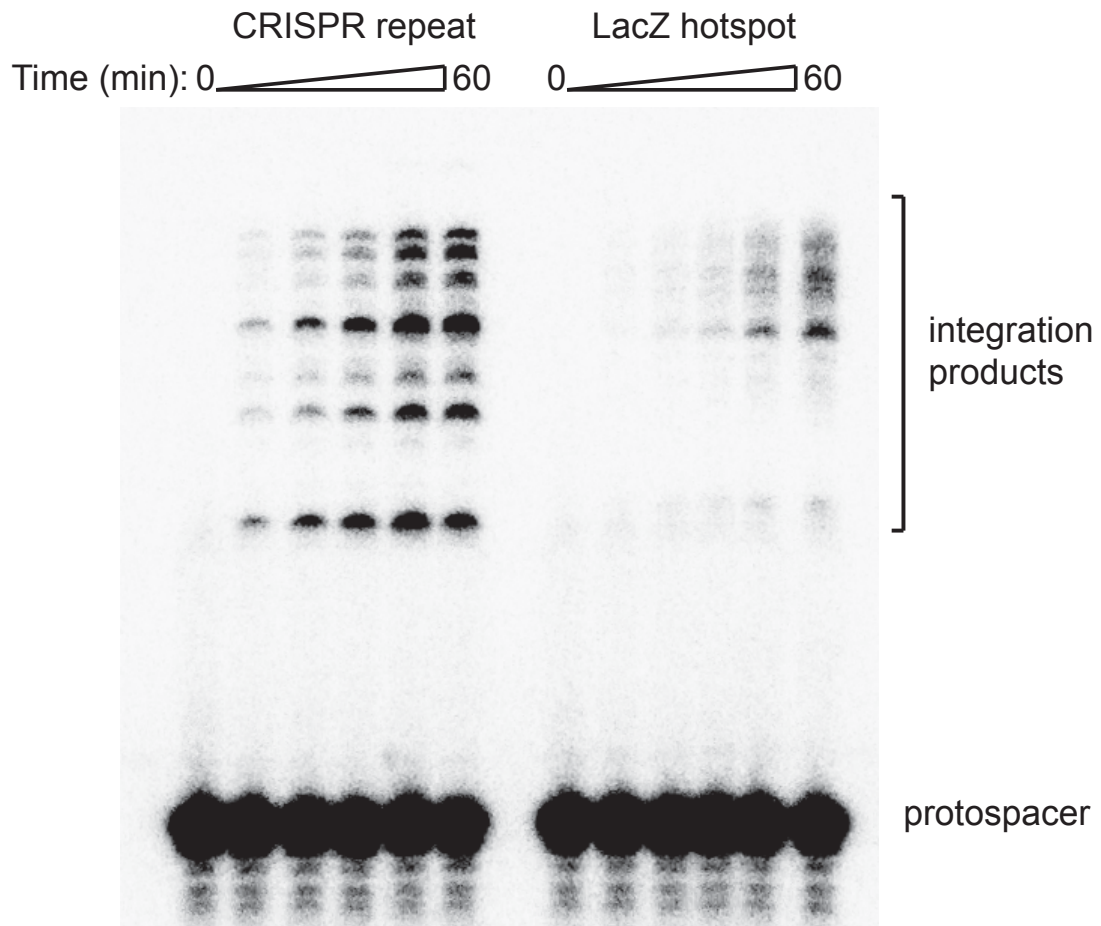

**Figure S3. Related to Figure 3. Integration of Protospacer into CRISPR Repeat and *lacZ* Hotspot**

Integration reactions are conducted with radiolabeled protospacer and target plasmids containing a CRISPR repeat or the *lacZ* hotspot identified from high-throughput sequencing. See Table S2 for nucleotide sequences.

Figure S4

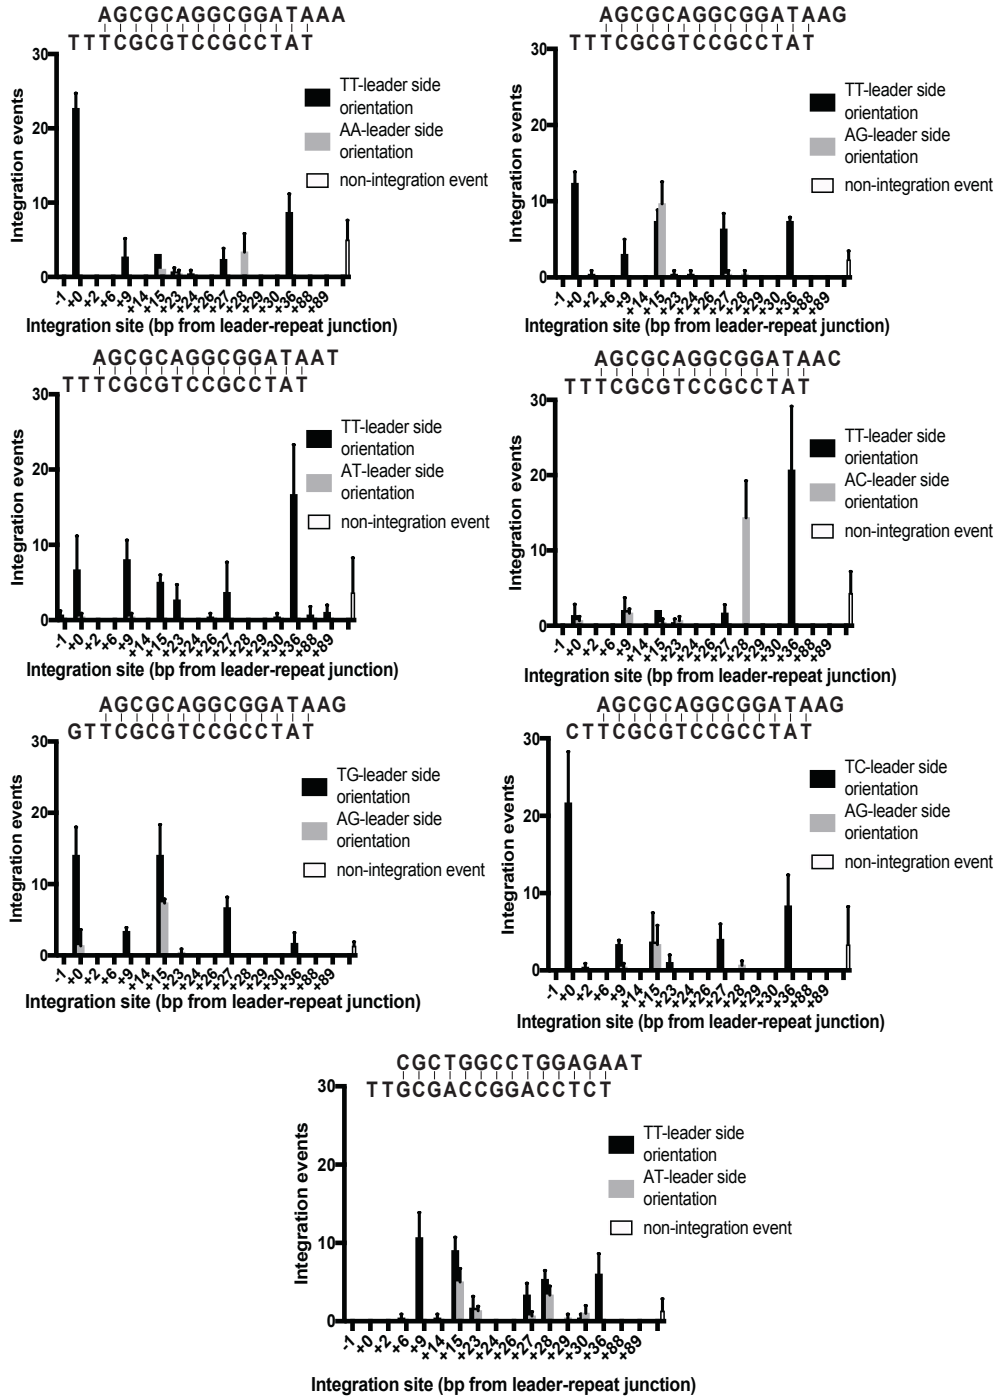

Figure S4. Related to Figure 4. Protospacer Sequence Influences Orientation During Full-Site Integration

Graphs show the number of integration events with specified spacer orientation at each integration site. The protospacer sequence is listed above each graph. The number of non-integration events (as a result of deletions) is also indicated. Mean and standard deviation of three independent replicates are plotted. See Table S2 for nucleotide sequences.

Figure S5

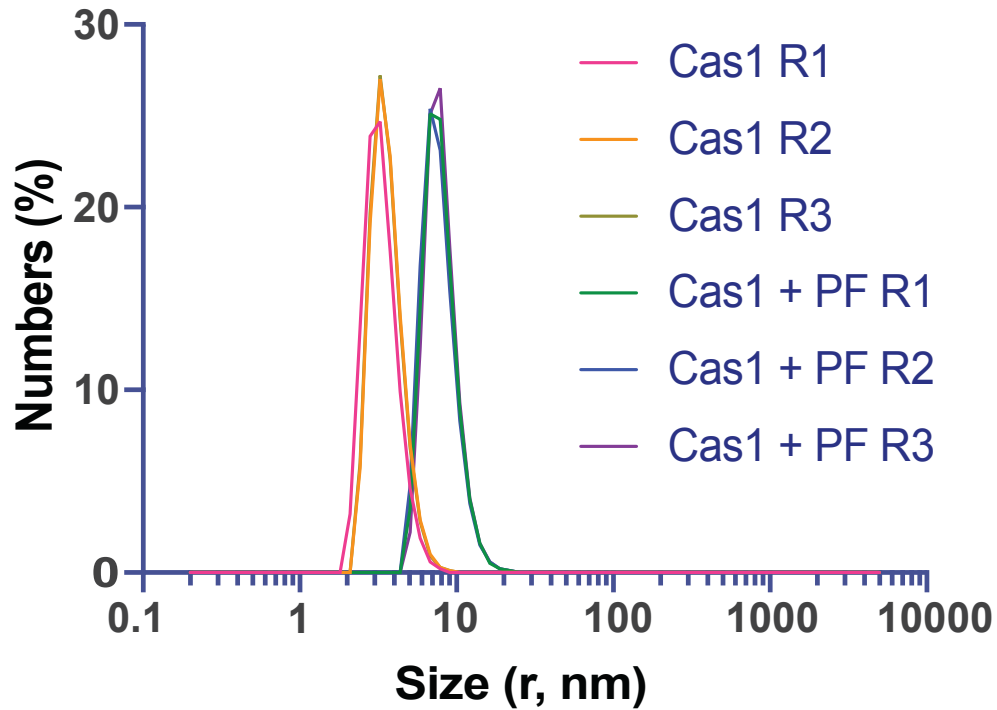

| Sample       | Mean size (r, nm) | Pdl  |
|--------------|-------------------|------|
| Cas1 R1      | 3.8 ± 0.8         | 0.39 |
| Cas1 R2      | 3.8 ± 0.8         | 0.40 |
| Cas1 R3      | 3.9 ± 0.7         | 0.45 |
| Cas1 + PF R1 | 7.7 ± 1.9         | 0.34 |
| Cas1 + PF R2 | 8.8 ± 1.9         | 0.42 |
| Cas1 + PF R3 | 8.0 ± 2.1         | 0.43 |

**Figure S5. Related to Figure 5. Dynamic Light Scattering Size Measurements of Apo Cas1 Compared to Cas1 with Added Pseudo-Full-Site Substrate**

Measurements were collected from three runs. The mean size with standard deviations and Pdl for each sample run are provided below the distribution plots. See Table S2 for nucleotide sequences.

Figure S6

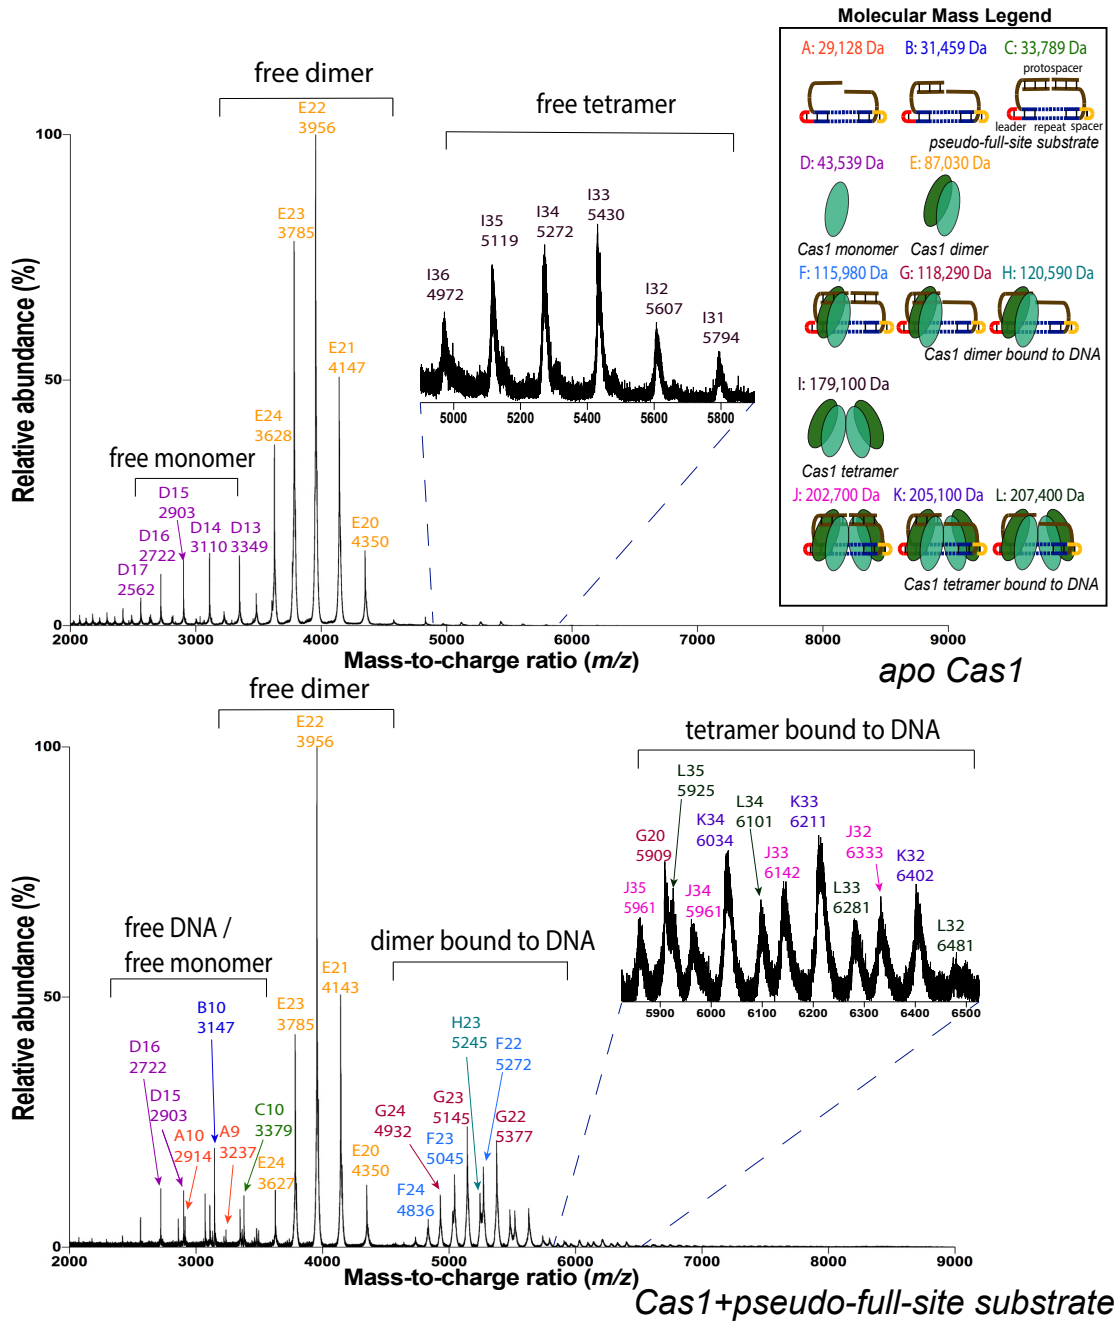

**Figure S6. Related to Figure 6. Native Mass Spectra of Apo V-C Cas1 Compared to V-C Cas1 Complexed with Pseudo-Full-Site Substrate**

The molecular masses of the detected species are listed on the top right. The ions of different species are labeled with different colors. See Table S2 for nucleotide sequences.

Table S1. Related to Figure 1. IMG Genome Sequences of Type V-C Cas1 from Mouse Cecum and V-D Cas1 from Beetle Gut

| Source                                                                                                  | Identifier                                                                                                                                                                                        | Sequence                                                                                                                                                                                                                                                                                                                                                                                                                         |
|---------------------------------------------------------------------------------------------------------|---------------------------------------------------------------------------------------------------------------------------------------------------------------------------------------------------|----------------------------------------------------------------------------------------------------------------------------------------------------------------------------------------------------------------------------------------------------------------------------------------------------------------------------------------------------------------------------------------------------------------------------------|
| <p>Passalidae beetle gut sample</p> <p>Sequenced at the JGI in 2012. Public data. PI: David Sherman</p> | <p><b>Taxon ID:</b><br/>330000114</p> <p><b>Scaffold ID:</b><br/>IMNBL3_c10001072</p> <p><b>Gene ID:</b><br/>IMNBL3_1000107225</p> <p><b>GOLD Analysis Project ID:</b><br/>Ga0026078</p>          | <p>MAHRIPLWLPYLSEVNVASGVIIHYVYKGGEDSVRLKDISSIMIYGETDA<br/>SFSFKTFEKISRAGIPVIYTRRNIGSPMIIHGGLRYDAVDTVTAQILARE<br/>NKKKQCHIARQLLKAKMNSMKHLAPVFELPDNANINELRNIEAKHAKKYW<br/>REYYTYIGHPEWTRRGEETGKNPVSDTLNLTSKFICGII LRWTLYHHLSP<br/>SHGYFHVMTDYQSLVYDLIEPYRALFDIELIRLFKDNAHLEENWPGMAIN<br/>LMKNKLNKKCYCPLTRQVVTYHELTHGIVLSLKSYLEGRQRKFHIFLPGS<br/>PNGGRPSKVEFKLYARNAGKTDFWKVAKEVADLDFACLSVG*</p>                                     |
| <p>Mouse cecum sample</p> <p>Sequenced at the JGI in 2016. Public data. PI: Michael Wagner</p>          | <p><b>Taxon ID:</b><br/>3300005460</p> <p><b>Scaffold ID:</b><br/>Ga0073908_1000520</p> <p><b>Gene ID:</b><br/>Ga0073908_1000520<br/>11</p> <p><b>GOLD Analysis Project ID:</b><br/>Ga0073908</p> | <p>MDQGNQTIENQTIINCDQHPDFLWTKSNKGRSRVSVWLPYFSQAKKIPRS<br/>KKWSVAYNGGSIEFDLKETDLIMFYGATGELPLEFLDDASKNGVMILHR<br/>RNVLPYVVFYPSVIGDEEDILTKQIQFRTNERKRLYIAKTLIKKRLNMG<br/>STIPISAPLLRQLSAAKSIDEVRAIEANTTARYWNKWYENLNIETTRKD<br/>HPINSALDAGSKFIYGVILRWLVFHRFSPNHGFMHQPTSYPSLVYDLMEP<br/>FRYMIENVCSAAWKRGERENSKI VALSLSFLKEELDKPCYVPATRQYVRK<br/>KNLLHGAVLALRSYLI GDMRKLVPFSEGVPNNGRPIKASYKLPGSMYDVG<br/>RKPPEIKQKDEICFDEVSQEESEE*</p> |

Table S2. Related to Figures 2-6, S1-S6. DNA Substrates Used in This Study

| Description                                 | Sequence                            | Figure    |
|---------------------------------------------|-------------------------------------|-----------|
| 15mer protospacer                           | GCGCAGGCGGATAAG                     | S1        |
| Fluorescent 15mer protospacer               | (5' 6-FAM ) GCGCAGGCGGATAAG         | 2         |
| RC <sup>1</sup>                             | CTTATCCGCCTGCGC                     | 2, S1     |
| 16mer protospacer                           | AGCGCAGGCGGATAAG                    | S1        |
| Fluorescent 16mer protospacer               | (5' 6-FAM ) AGCGCAGGCGGATAAG        | 2         |
| RC                                          | CTTATCCGCCTGCGCT                    | 2, S1     |
| 17mer protospacer                           | AAGCGCAGGCGGATAAG                   | S1        |
| Fluorescent 17mer protospacer               | (5' 6-FAM ) AAGCGCAGGCGGATAAG       | 2         |
| RC                                          | CTTATCCGCCTGCGCTT                   | 2, S1     |
| 18mer protospacer                           | AAAGCGCAGGCGGATAAG                  | S1        |
| Fluorescent 18mer protospacer               | (5' 6-FAM ) AAAGCGCAGGCGGATAAG      | 2         |
| RC                                          | CTTATCCGCCTGCGCTTT                  | 2, S1     |
| 18mer protospacer for sequencing (+) strand | CACGCTGGCCTCGGAGAG                  | 3, S2, S3 |
| RC ((-) strand)                             | CTCTCCGAGGCCAGCGTG                  | 3, S2, S3 |
| 19mer protospacer                           | GAAAGCGCAGGCGGATAAG                 | S1        |
| Fluorescent 19mer protospacer               | (5' 6-FAM ) GAAAGCGCAGGCGGATAAG     | 2         |
| RC                                          | CTTATCCGCCTGCGCTTTC                 | 2, S1     |
| 20mer protospacer                           | AGAAAGCGCAGGCGGATAAG                | S1        |
| Fluorescent 20mer protospacer               | (5' 6-FAM ) AGAAAGCGCAGGCGGATAAG    | 2         |
| RC                                          | CTTATCCGCCTGCGCTTTCT                | 2, S1     |
| 21mer protospacer                           | AGAAAGTCGCAGGCGGATAAG               | S1        |
| Fluorescent 21mer protospacer               | (5' 6-FAM ) AGAAAGTCGCAGGCGGATAAG   | 2         |
| RC                                          | CTTATCCGCCTGCGACTTTCT               | 2, S1     |
| 22mer protospacer                           | AGAAAGTCGCAGGCTGGATAAG              | S1        |
| Fluorescent 22mer protospacer               | (5' 6-FAM ) AGAAAGTCGCAGGCTGGATAAG  | 2         |
| RC                                          | CTTATCCAGCCTGCGACTTTCT              | 2, S1     |
| 23mer protospacer                           | AGAAAGTCCGCAGGCTGGATAAG             | S1        |
| Fluorescent 23mer protospacer               | (5' 6-FAM ) AGAAAGTCCGCAGGCTGGATAAG | 2         |
| RC                                          | CTTATCCAGCCTGCGGACTTTCT             | 2, S1     |
| 23mer protospacer with 3' P modification    | AGAAAGTCCGCAGGCTGGATAAG (3'P)       | S1        |
| RC with 3' P modification                   | CTTATCCAGCCTGCGGACTTTCT (3'P)       | S1        |
| 24mer protospacer                           | AGAAAGTCCGCAGGCATGGATAAG            | S1        |

<sup>1</sup> RC: reverse complementary strand of the previous oligonucleotide



|                                                                                                     |                                                  |              |
|-----------------------------------------------------------------------------------------------------|--------------------------------------------------|--------------|
| Fluorescent 24mer protospacer                                                                       | (5' 6-FAM ) AGAAAGTCCGCAGGCATGGATAAG             | 2            |
| RC                                                                                                  | CTTATCCATGCCTGCGGACTTTCT                         | 2, S1        |
| 25mer protospacer                                                                                   | AGAAAGTCCGCAGGCATGGATAAG                         | S1           |
| Fluorescent 25mer protospacer                                                                       | (5' 6-FAM ) AGAAAGTCCGCAGGCATGGATAAG             | 2            |
| RC                                                                                                  | CTTATCCATGCCTGCCGGACTTTCT                        | 2, S1        |
| 33mer protospacer                                                                                   | GCGAGAATTACTACTCGTTCTGGTGTTCCTCGC                | 2            |
| RC                                                                                                  | GCGAGAAACACCAGAACGAGTAGTAATTCTCGC                | 2            |
| 1-nt overhang protospacer                                                                           | AAGCGCAGGCGGATAAG                                | S1           |
| RC                                                                                                  | TTATCCGCCTGCGCTTT                                | S1           |
| 2-nt overhang protospacer (G)                                                                       | AGCGCAGGCGGATAAG                                 | 4, 5, S1, S4 |
| RC (T)                                                                                              | TATCCGCCTGCGCTTT                                 | 4, 5, S1, S4 |
| RC (A)                                                                                              | TATCCGCCTGCGCTTA                                 | S4           |
| RC (C)                                                                                              | TATCCGCCTGCGCTTC                                 | S4           |
| RC (G)                                                                                              | TATCCGCCTGCGCTTG                                 | S4           |
| 3-nt overhang protospacer                                                                           | GCGCAGGCGGATAAG                                  | S1           |
| RC                                                                                                  | ATCCGCCTGCGCTTT                                  | S1           |
| 4-nt overhang protospacer                                                                           | CGCAGGCGGATAAG                                   | S1           |
| RC                                                                                                  | TCCGCCTGCGCTTT                                   | S1           |
| 2-nt overhang protospacer (A)                                                                       | AGCGCAGGCGGATAAA                                 | S4           |
| 2-nt overhang protospacer (C)                                                                       | AGCGCAGGCGGATAAC                                 | S4           |
| 2-nt overhang protospacer (T)                                                                       | AGCGCAGGCGGATAAT                                 | S4           |
| Pseudo-full-site half-protospacer - repeat - spacer - hairpin - spacer (pseudo-full-site substrate) | GGCGGCGGACCCATTATTGGAAGGGTTTATAAGG CTCACGAAGTGAG | 5, 6, S5, S6 |
| Pseudo-full-site half-protospacer - repeat - leader - hairpin - leader (pseudo-full-site substrate) | GGCGGCGGTCTTATAAACCCCTTCCAATAATGGG AGACTGAAAGTCT | 5, 6, S5, S6 |
| Pseudo-full-site half-protospacer                                                                   | CCGCCGCC                                         | 5, 6, S5, S6 |
| Half-site protospacer-repeat-spacer                                                                 | ACGCTGGCCTCGGAGAGCCCATTATTGGAAGGGT TTATAAGGATCAA | 5            |
| Half-site protospacer                                                                               | TCTCCGAGGCCAGCGTG                                | 5            |
| Half-site spacer-repeat-leader-hairpin-leader                                                       | TTGATCCTTATAAACCCCTTCCAATAATGGGAGACT GAAAGTCT    | 5            |

|                                                         |                                                                                               |       |
|---------------------------------------------------------|-----------------------------------------------------------------------------------------------|-------|
| CRISPR repeat target                                    | AAGCAGGTCTTCTTTACTTTTCCTTATAAACCCCTTCC<br>AATAATGGGAGACTAGCAAATATCTATTTGAAAGT<br>CAAT         | S3    |
| RC                                                      | ATTGACTTTCAAATAGATATTTGCTAGTCTCCCAT<br>ATTGGAAGGGTTTATAAGGAAAGTAAAGAAGACCT<br>GCTT            | S3    |
| <i>lacZ</i> hotspot target                              | CAGGCTGCGCAACTGTTGGGAAGGGCGATCGGT<br>GCGGGCCTCTTCGCTATTACGCCAGCTGGCGAAA<br>GGGGGATG           | S3    |
| RC                                                      | CATCCCCCTTTCGCCAGCTGGCGTAATAGCGAAG<br>AGGCCCGCACCGATCGCCCTTCCCAACAGTTGCG<br>CAGCCTG           | S3    |
| Sequencing Y-adapter<br>strand 1 <sup>2</sup>           | GTGACTGGAGTTCAGACGTGTGCTCTTCCGATC*T                                                           | 3, S2 |
| Sequencing Y-adapter<br>strand 2                        | GATCGGAAGAGCTGT                                                                               | 3, S2 |
| (+)-strand protospacer-<br>specific barcoding<br>primer | AATGATACGGCGACCACCGAGATCTACACTCTTTC<br>CCTACACGACGCTCTTCCGATCTNNWNNWNNCAC<br>GCTGGCCTCGGAGA*G | 3, S2 |
| (-)-strand protospacer-<br>specific barcoding<br>primer | AATGATACGGCGACCACCGAGATCTACACTCTTTC<br>CCTACACGACGCTCTTCCGATCTNNWNNWNNCTC<br>TCCGAGGCCAGCGT*G | 3, S2 |

---

<sup>2</sup> \*: phosphorothioate bond
